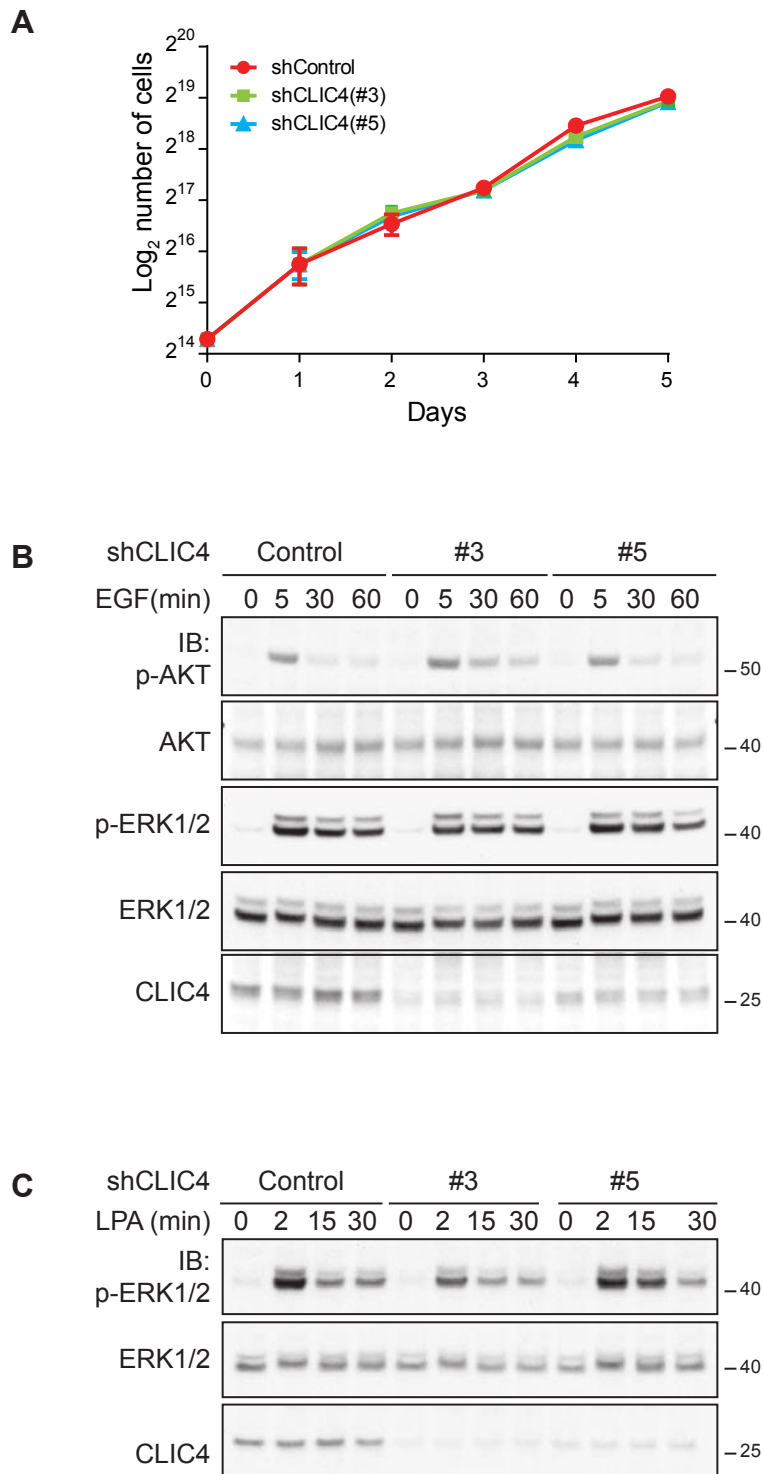

**Figure S1. CLIC4 knockdown does not affect cell proliferation and growth factor signaling.**

(A) Growth curves of shControl and shCLIC4 HeLa cells. (B-C) Growth factor-induced signaling. Serum starved shControl and shCLIC4 HeLa cells were left untreated or stimulated with 100 ng/ml EGF (B) or 5  $\mu$ M LPA (C) for the indicated time points. AKT and ERK1/2 activation in time were monitored by immunoblot analysis of total cell lysates using anti-p-AKT and p-ERK1/2 antibodies. AKT and ERK were used as loading controls. Representative blots of one out of two experiments are shown.

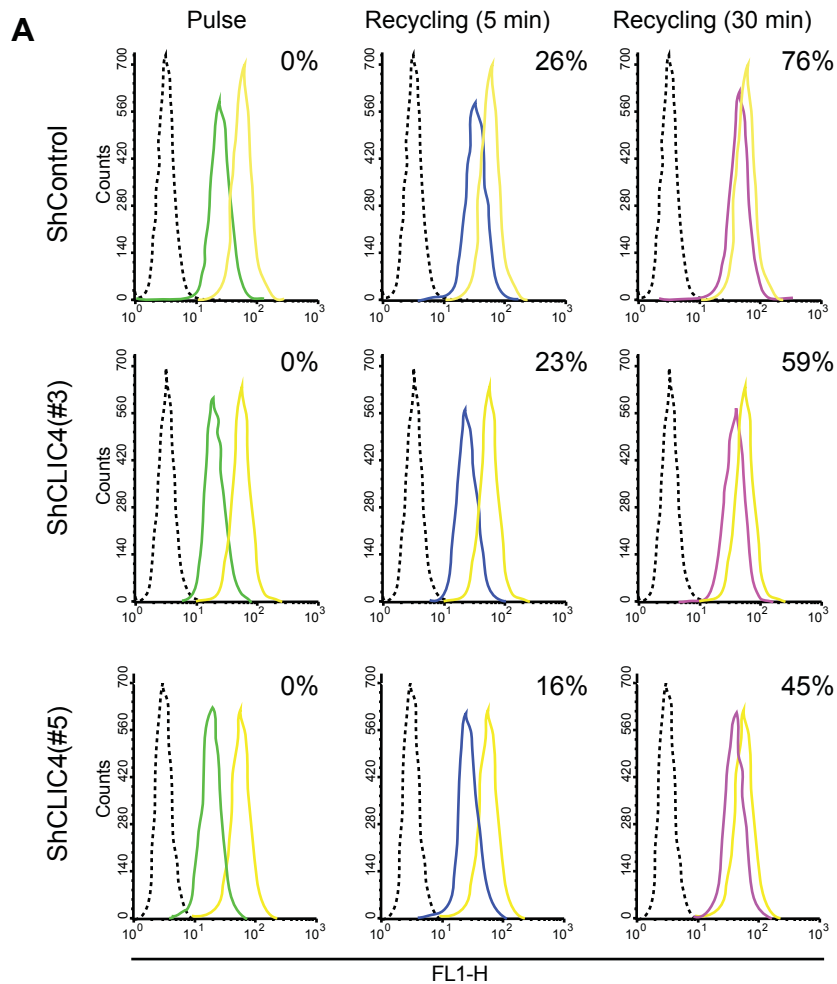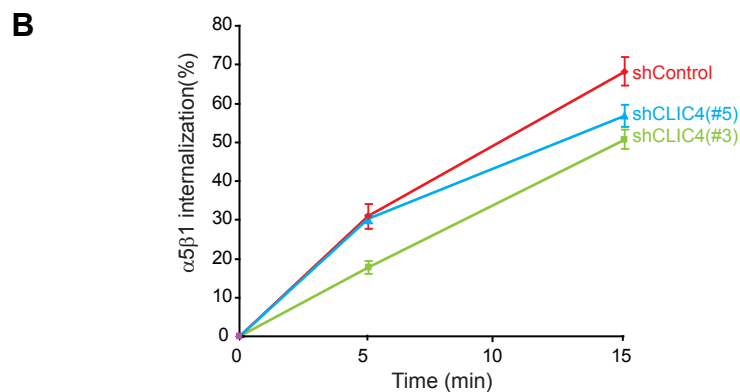

**Figure S2. CLIC4 knockdown reduces recycling and internalization of  $\alpha 5 \beta 1$  integrin**

(A) FACS-based recycling assay. Serum starved shControl and shCLIC4 HeLa cells were incubated for 1 hour with anti- $\beta 1$  antibody TS2/16 on ice. Cells were shifted at 37°C for 30 min (pulse), washed with an acidic buffer to strip the anti- $\beta 1$  antibody at the plasma membrane and further incubated in presence of 10%FBS and FITC-conjugated secondary antibody for 5 and 30 min (recycling). Cells were gently scraped and analyzed by flow cytometry. Representative histograms of one out of two experiments are shown. Negative control= dashed black line, surface  $\beta 1$  integrin = yellow line, Pulse= green line, 5 minutes recycling= blue line, 30 minutes recycling= magenta line. Percentage of recycled  $\beta 1$  integrin is shown. 50000 cells were analyzed for each time point.

(B) Biotin-based internalization assay. shControl and shCLIC4 HeLa cells were surface labeled with NHS-S-S-Biotin. Internalization was allowed to proceed for the indicated time points at 37°C. Cell surface biotin was reduced with MesNa at 4°C and the amount of internalized, biotin-labeled integrins was determined by capture ELISA using an anti- $\alpha 5$  integrin antibody. Data represent mean  $\pm$  SEM of three independent experiments.

**Table S1. CLIC4 knockdown does not affect expression of integrin  $\alpha/\beta$  subunits.**

Table showing expression of integrin  $\alpha/\beta$  subunits. Cells were trypsinized, incubated with the indicated antibody against  $\alpha$ - and  $\beta$ - integrin subunits and analyzed by flow cytometry. Staining with secondary antibody only was used as negative control. Geometric means  $\pm$  SD from three independent experiments are shown.

|        | shControl |       | shCLIC4(#3) |       | p-value |
|--------|-----------|-------|-------------|-------|---------|
|        | Geo Mean  | SD    | Geo Mean    | SD    |         |
| FITC   | 3.69      | 0.57  | 3.12        | 0.44  | 0.059   |
| alpha2 | 17.07     | 3.88  | 10.37       | 3.12  | 0.004   |
| alpha3 | 38.84     | 13.77 | 36.20       | 11.79 | 0.856   |
| alpha5 | 10.59     | 1.00  | 9.84        | 1.55  | 0.621   |
| alpha6 | 30.53     | 7.93  | 29.51       | 12.77 | 0.932   |
| alphav | 23.17     | 1.96  | 18.09       | 0.26  | 0.068   |
| beta1  | 45.23     | 9.10  | 39.95       | 11.85 | 0.407   |
| beta3  | 3.93      | 0.67  | 3.20        | 0.57  | 0.058   |
| beta4  | 8.67      | 1.53  | 7.30        | 1.44  | 0.456   |
